# Supplementary material for: Acquired Initiating Mutations in Early Hematopoietic Cells of CLL Patients
Source: Oxford University Press journal article supplement (doi:10.1158/2159-8290.cd-14-0104), 2014-06-12
Supplement: 21598290cd140104-sup-tab3.pdf [file 21598290cd140104-sup-tab3.pdf]

**Supplementary Table S3.** Biological and clinical features of the 168 CLL patients according to *EGR2*, *NFKBIE* and *BRAF* mutations

|                                                  | <i>EGR2</i> -<br>wildtype<br>n=154 | <i>EGR2</i> -<br>mutated<br>n=14 | <i>P</i> | <i>NFKBIE</i> -<br>wildtype<br>n =150 | <i>NFKBIE</i> -<br>mutated<br>n=18 | <i>P</i> | <i>BRAF</i> -<br>wildtype<br>n=162 | <i>BRAF</i> -<br>mutated<br>n=6 | <i>P</i> |
|--------------------------------------------------|------------------------------------|----------------------------------|----------|---------------------------------------|------------------------------------|----------|------------------------------------|---------------------------------|----------|
| <b>Age</b> (years), median                       | 56.6                               | 54.6                             | .61      | 56.6                                  | 56.1                               | .86      | 56.6                               | 56.1                            | .77      |
| range                                            | 39.6 – 66                          | 39.1 – 63.1                      |          | 39.1 – 66                             | 45.7-65.8                          |          | 39.1 – 66.0                        | 43.7 – 64.4                     |          |
| <b>Sex</b>                                       |                                    |                                  | .75      |                                       |                                    | 1        |                                    |                                 | .34      |
| Female                                           | 37                                 | 4                                |          | 37                                    | 4                                  |          | 41                                 | 0                               |          |
| Male                                             | 117                                | 10                               |          | 113                                   | 14                                 |          | 121                                | 6                               |          |
| <b>Binet stage</b>                               |                                    |                                  | .33      |                                       |                                    | 1        |                                    |                                 | .63      |
| B                                                | 119                                | 9                                |          | 114                                   | 14                                 |          | 124                                | 4                               |          |
| C                                                | 35                                 | 5                                |          | 36                                    | 4                                  |          | 38                                 | 2                               |          |
| <b>Lymphocytes</b> (x10 <sup>9</sup> /L), median |                                    |                                  | .69      |                                       |                                    | .66      |                                    |                                 | .11      |
| Range                                            | 53.3<br>3.68 – 849                 | 45.9<br>53.3 - 396               |          | 50.1<br>36.8 – 849                    | 58.2<br>43.4 - 605                 |          | 53.87<br>36.8 - 849                | 26.02<br>6.10 - 838.8           |          |
| <b>Haemoglobin</b> (g/L), median                 | 13.5                               | 12.1                             | .06      | 13.3                                  | 13.6                               | .91      | 13.3                               | 13.5                            | .29      |
| Range                                            | 7.5 - 16.6                         | 7.9 - 15.6                       |          | 7.5 - 16.6                            | 9.3 - 14.8                         |          | 7.5 - 16.6                         | 12.8 - 16.4                     |          |
| <b>Platelets</b> (x10 <sup>9</sup> /L), median   | 168                                | 157.5                            | .73      | 168                                   | 180.5                              | .39      | 170                                | 123                             | .3       |
| Range                                            | 29 - 404                           | 7.9 - 356                        |          | 7.91 - 404                            | 70 - 301                           |          | 7.91 - 404                         | 83 - 271                        |          |
| <b>CD38<sup>+</sup></b> high (>30%), median      | 17                                 | 70                               | .009     | 19                                    | 16                                 | .99      | 18                                 | 57.5                            | .36      |
| Range                                            | 0 - 100                            | 4 - 99                           |          | 0 - 100                               | 0 - 87                             |          | 0 - 100                            | 1 - 88                          |          |
| <b>sCD23<sup>+</sup></b> , median                | 257                                | 237.5                            | .8       | 258                                   | 256                                | .90      | 257                                | 510.5                           | .27      |
| range                                            | 47 - 910                           | 80 - 440                         |          | 47 - 910                              | 102 - 489                          |          | 47 - 910                           | 250 - 771                       |          |
| <b>ZAP-70<sup>+</sup></b>                        |                                    |                                  | .44      |                                       |                                    | .51      |                                    |                                 | .30      |
| Positiv (≥20%)                                   | 79                                 | 8                                |          | 77                                    | 10                                 |          | 85                                 | 2                               |          |
| negativ                                          | 32                                 | 1                                |          | 31                                    | 2                                  |          | 31                                 | 2                               |          |
| <b>IGHV</b> mutated                              | 51                                 | 2                                | .22      | 52                                    | 1                                  | .056     | 53                                 | 1                               | .66      |
| unmutated (≥ 98% homology)                       | 94                                 | 11                               |          | 90                                    | 15                                 |          | 100                                | 5                               |          |
| <b>del(13)(q14.3)</b>                            |                                    |                                  | 0.2      |                                       |                                    | .28      |                                    |                                 | .78      |
| absent                                           | 59                                 | 9                                |          | 63                                    | 5                                  |          | 65                                 | 3                               |          |
| present, mono-allelic                            | 65                                 | 4                                |          | 60                                    | 9                                  |          | 67                                 | 2                               |          |
| present, bi-allelic                              | 11                                 | 0                                |          | 9                                     | 2                                  |          | 11                                 | 0                               |          |
| <b>del(11)(q22.3)</b>                            |                                    |                                  | .11      |                                       |                                    | .13      |                                    |                                 | .57      |
| absent                                           | 103                                | 7                                |          | 101                                   | 9                                  |          | 106                                | 4                               |          |
| present                                          | 34                                 | 6                                |          | 33                                    | 7                                  |          | 40                                 | 0                               |          |
| <b>+12</b>                                       |                                    |                                  | 1        |                                       |                                    | .37      |                                    |                                 | .41      |
| absent                                           | 128                                | 11                               |          | 123                                   | 16                                 |          | 135                                | 4                               |          |
| present                                          | 14                                 | 1                                |          | 15                                    | 0                                  |          | 14                                 | 1                               |          |
| <b>del(17)(p13.1)</b>                            |                                    |                                  | .6       |                                       |                                    | .37      |                                    |                                 | .032     |
| absent                                           | 126                                | 13                               |          | 123                                   | 16                                 |          | 137                                | 2                               |          |
| present                                          | 12                                 | 0                                |          | 12                                    | 0                                  |          | 10                                 | 2                               |          |
